# Supplementary material for: The role of retinol dehydrogenase 10 in the cone visual cycle
Source: PubMed Central journal article supplement (PMC5443843; doi:10.1038/s41598-017-02549-8), 2017-05-24
Supplement: 41598_2017_2549_MOESM1_ESM.pdf [file 41598_2017_2549_MOESM1_ESM.pdf]

## The role of retinol dehydrogenase 10 in the cone visual cycle

Yunlu Xue<sup>1,#a</sup>, Shinya Sato<sup>1</sup>, David Razafsky<sup>1,#b</sup>, Bhubanananda Sahu<sup>2</sup>, Susan Q. Shen<sup>3</sup>, Chloe Potter<sup>1</sup>, Lisa L. Sandell<sup>4</sup>, Joseph C. Corbo<sup>3</sup>, Krzysztof Palczewski<sup>5</sup>, Akiko Maeda<sup>2,5</sup>, Didier Hodzic<sup>1</sup>, and Vladimir J. Kefalov<sup>1\*</sup>

**Supplemental Table 1.** Significantly differentially expressed genes in *rd7* vs. wild-type retinas by RNA-seq.
